## CORRECTION

# Correction: Predation drives complex eco-evolutionary dynamics in sexually selected traits

Brian A. Lerch, Maria R. Servedio

In the Continuous model subsection of the Methods, there is a typo in the second equation. The numerator is incorrect. This error was not present in the code used for analyses and thus the results are unaffected. Please view the complete, correct equation here:

$$\frac{dP}{dt} = c_c \frac{P(b_c(N_f + N_m) + s_c \bar{z}N_m)}{1 + t_h(b_c(N_f + N_m) + s_c \bar{z}N_m)} - mP$$

## Reference

1. Lerch BA, Servedio MR. Predation drives complex eco-evolutionary dynamics in sexually selected traits. *PLoS Biol.* 2023;21(4): e3002059. <https://doi.org/10.1371/journal.pbio.3002059> PMID: [37011094](https://pubmed.ncbi.nlm.nih.gov/37011094/)

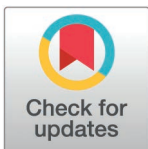

## OPEN ACCESS

**Citation:** Lerch BA, Servedio MR (2025) Correction: Predation drives complex eco-evolutionary dynamics in sexually selected traits. *PLoS Biol* 23(4): e3003125. <https://doi.org/10.1371/journal.pbio.3003125>

**Published:** April 4, 2025

**Copyright:** © 2025 Lerch. This is an open access article distributed under the terms of the [Creative Commons Attribution License](https://creativecommons.org/licenses/by/4.0/), which permits unrestricted use, distribution, and reproduction in any medium, provided the original author and source are credited.
